# Supplementary material
Source: PubMed Central journal article supplement (PMC4483153)

## Supplement I. Supplemental Methods

### Reagents and Antibodies

For flow cytometry or cell sorting, cells were incubated with the following primary antibodies: PE-conjugated anti-PTK7 (Miltenyi Biotec, Bergisch Gladbach, Germany), FITC-conjugated anti-CD11b, FITC-conjugated anti-CD45, FITC-conjugated anti-F4/80, APC-conjugated anti-F4/80 were purchased from eBioscience (San Diego, CA). APC-conjugated anti-VEGFR2 was purchased from Biolegend (San Diego, CA). Anti-CD13 (WM15) and anti-VEGFR1 blocking antibodies (AP-MAB0702) was purchased from Abcam (Cambridge, MA). Mouse angiopoietin-1 (AB3120) and -2 (AB3121) antibodies for ELISA, phospho-Tie2 (ABS219), and total Tie2 (AB3126) for western blot analysis were purchased from Merck Millipore (Darmstadt, Germany). Anti-mouse VEGFR2,  $\alpha$ -tubulin, and  $\alpha$ -actin were purchased from Santa Cruz Biochemicals (Santa Cruz, CA). Anti-I $\kappa$ B $\alpha$  (#2859), phospho-VEGFR2 (Tyr951, 7H11, #2476), and anti-phospho-I $\kappa$ B $\alpha$  (#4812) were from Cell Signaling (Beverly, MA). For the immunofluorescence assay, anti-PTK7-biotin, anti-PTK7 (Miltenyl Biotec, Bergisch Gladbach, Germany), FITC-conjugated anti-CD31 (Santa Cruz, CA), streptavidin-Cy5 (Biolegend, San Diego, CA), and the TRITC-conjugated secondary antibodies (Jackson ImmunoResearch Laboratories, West Grove, PA) were used. Carrier free Mouse VEGF-A<sub>164</sub> was purchased from Cell Signaling (Company information). LY294002, SB203580, PD98059, SN50, SN50M, Rapamycin, and DMSO were purchased from Sigma Aldrich (St. Louis, MO). RPMI 1640, Penicillin/Streptomycin, and fetal bovine serum were from GIBCO Life Technologies (Carlsbad, CA). RNAi products for ANG-1 (GS11600) and ANG-2 (GS11601) were from Qiagen (Limburg, Netherlands). siRNA for PTK7 and VEGFR2 was from Thermo Fisher Scientific Inc. (Waltham, MA) and Invitrogen (Carlsbad, CA), respectively.

## Supplement II. Primers used for quantitative real-time qPCR

| Target gene                       | Sequence      |
|-----------------------------------|---------------|
| <i>vegfr2</i>                     | Mm01222421_m1 |
| <i>dll4</i>                       | Mm00444619_m1 |
| <i>tie2</i>                       | Mm01256904_m1 |
| <i>ve-cadherin</i>                | Mm00486938_m1 |
| <i>ANG-2</i>                      | Mm00516078_m1 |
| <i>Apelin</i>                     | Mm00443562_m1 |
| <i>ephrin B2</i>                  | Mm01215897_m1 |
| <i>vegfr1</i>                     | Mm00438980_m1 |
| <i>unc5b</i>                      | Mm00504054_m1 |
| <i>cxcr4</i>                      | Mm01996749_s1 |
| <i>plxnd1</i>                     | Mm01184367_m1 |
| <i>nrp1</i>                       | Mm01253206_m1 |
| <i>nrp2</i>                       | Mm00803099_m1 |
| <i>CD34</i>                       | Mm00519283_m1 |
| <i><math>\beta</math>-tubulin</i> | Mm00727586_s1 |
| <i>ANG-1</i>                      | Mm00456503_m1 |
| <i>PDGRF- <math>\beta</math></i>  | Mm00435546_m1 |
| <i>Desmin</i>                     | Mm00802455_m1 |
| <i><math>\alpha</math>-sma</i>    | Mm00516078_m1 |
| <i>Gapdh</i>                      | Mm03302249_g1 |

*vegfr2*: vascular endothelial growth factor receptor 2, *dll4*: delta like ligand 4, *tie2*: tyrosine-protein kinase receptor tie2, *ve-cadherin*: vascular endothelium-cadherin, *ANG*: angiopoietin, *unc5b*: uncoordinated locomotion-5 homolog B, *plxnd1*: plexin D1, *nrp2*: neuropilin2,  *$\alpha$ -sma*: alpha-smooth muscle actin.

All primers described in the tables are from TaqMan® Gene Expression Assays (Applied Biosystems).

**Supplement III. Frequencies of PTK7+ cells, budding vasculature, and opacity were increased in the cornea after micropellet implantation.** The level of budding vasculature (BV) and cell frequencies of infiltrating PTK7+ cells were measured 0, 2, 5, 7, and 14 days after micropellet implantation (BV: +, vascular budding; ++, vascular growing not reaching the VEGF-A pellet; +++, mature BV reaching the pellet.) PTK7+ cells were counted by using epifluorescein microscopy. At least three mice eye were evaluated at each time point. Five random high power fields (HPF;  $\times 400$ ) were selected and summarized in each mouse. The graph represents the mean value of percent changes from day 0 at each experiments day.

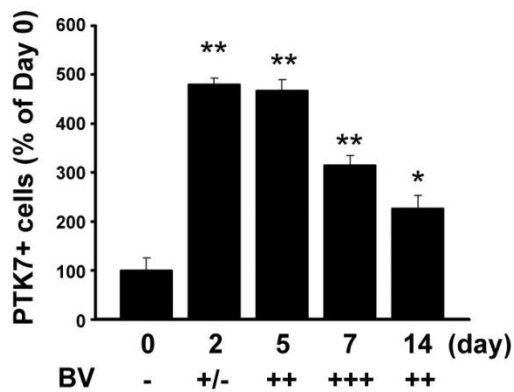

**Supplement IV. Immunofluorescence co-staining of CD31<sup>+</sup> blood vessels and PTK7<sup>+</sup> cells.**

**A and B,** Three days following VEGF-A pellet insertion, secured full-thickness corneal tissues were stained with anti-CD31 FITC and anti-PTK7 TRITC and observed by epifluorescence microscopy (Nikon, Eclipse TE200 instrument equipped with a Nikon digital camera, model DXM 1200). The white arrows indicate PTK7<sup>+</sup> cells that are attached to CD31<sup>+</sup> cells. Yellow arrowheads indicate overlapped PTK7<sup>+</sup> with CD31 cells.

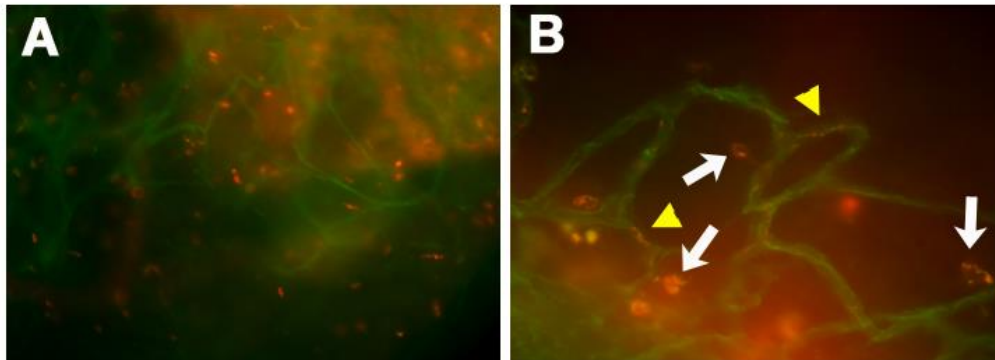

**Supplement V.** Video Clip showing that most PTK7+ cells are located near the angiogenic area, and do not express VEC marker, PECAM-1, and also do not incorporate into new vessels.

**Supplement VI.** Comparison of inflammatory cell changes in peripheral blood and cornea between vehicle and VEGF-A pellet inserted condition.

The upper histogram showed the changes of CD11b+ cells after corneal micropellet surgery. The lower panel showed the changes of PTK7+CD45+ cells between vehicle and VEGF-A pellet inserted condition at POD (postoperative days) 3 and 7.

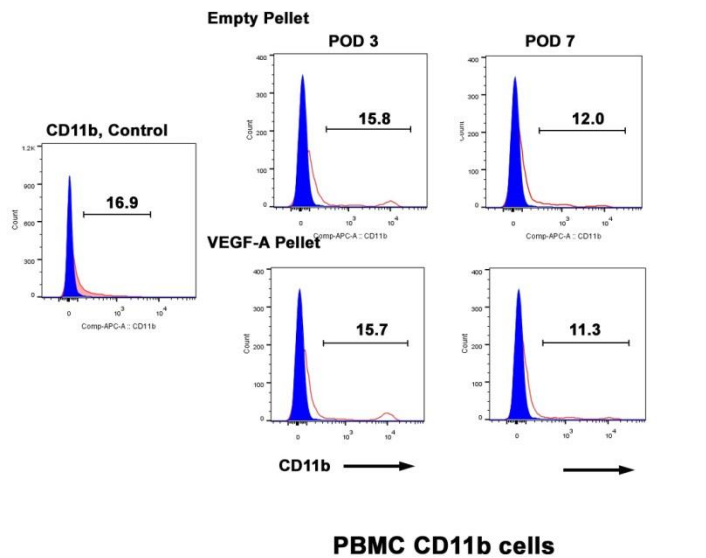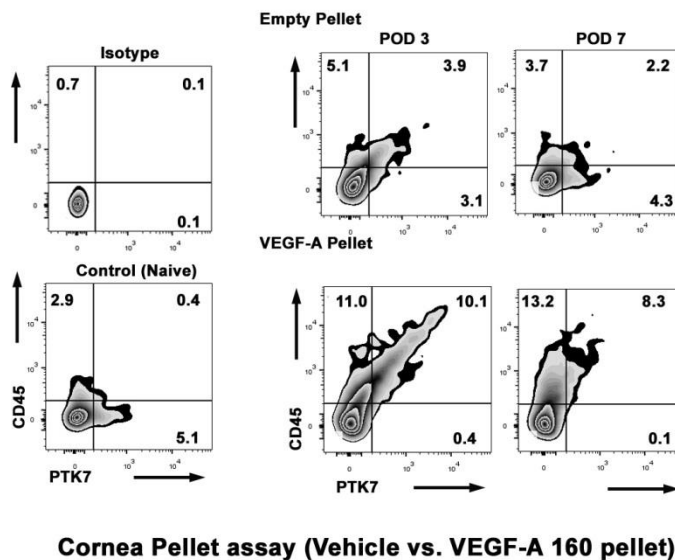

**Supplement VII.** VEGF-A corneal pellets were implanted in 6-week-old Balb/c mice (n=7) under general anesthesia. PBMCs were stained with monoclonal anti-mouse PTK7-PE-, CD11b-FITC-, and VEGFR2-APC-conjugated antibodies. Frequencies of VEGFR2<sup>+</sup>PTK7<sup>+</sup> were measured in CD11b<sup>+</sup> and F4/80<sup>+</sup> cells on postoperative day (POD) 0, 3, and 7 using flow cytometry.

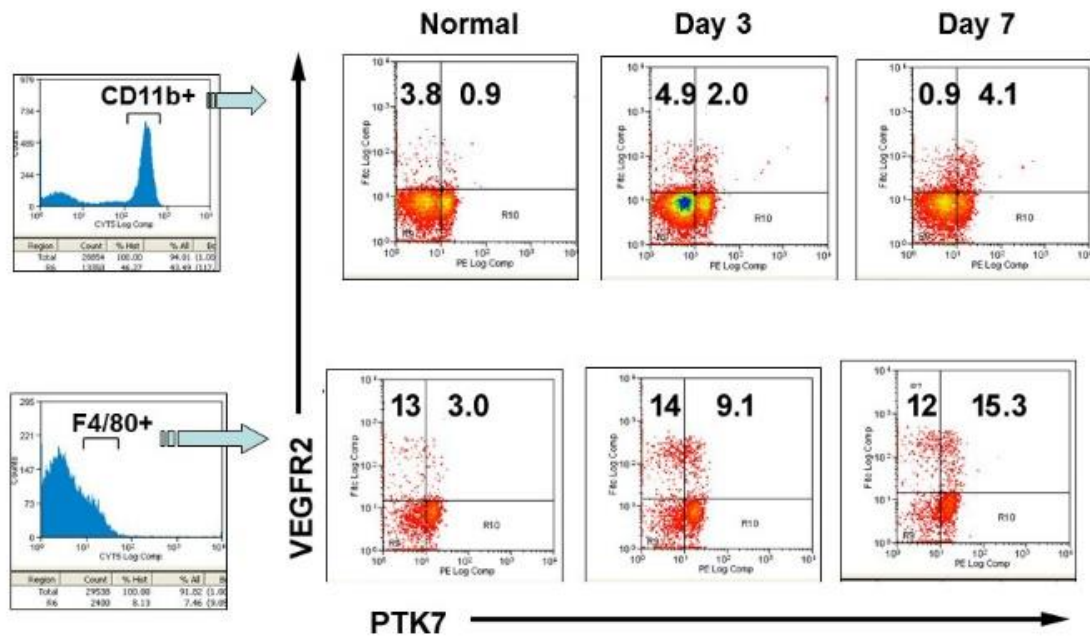

**Supplement VIII.** Mononuclear cells were separated from the BM, blood, cornea, and spleen at postoperative day (POD) 1 and 7. Real-Time qPCR was performed for *VEGFR2* in PTK7<sup>+</sup>CD45<sup>+</sup> and PTK7<sup>-</sup>CD45<sup>+</sup> cells, which were separated by FACS Aria. Fold increases in non-operated control cells were also measured (\*: p<0.05, \*\*: p<0.01, \*\*\*: p<0.001, One-way ANOVA).

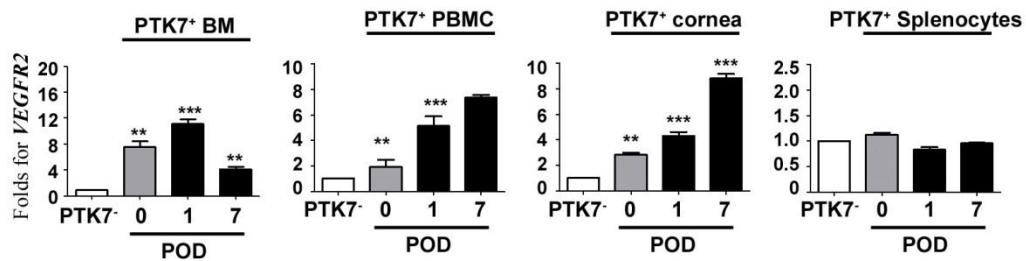

**Supplement IX.** Comparison of desmin mRNA expression between PTK7+CD11b+ and PTK7-CD11b+ cells in bone marrow (BM) and cornea after VEGF-A (160ng) micropellet implantation. Desmin mRNA levels of PTK7+ and PTK7- cells were normalized by the expression of GAPDH at each postoperative days (POD) (For each sample we analyzed triplicates in 3 independent experiments. Wilcoxon Rank Sum Test, \*\*: p<0.01).

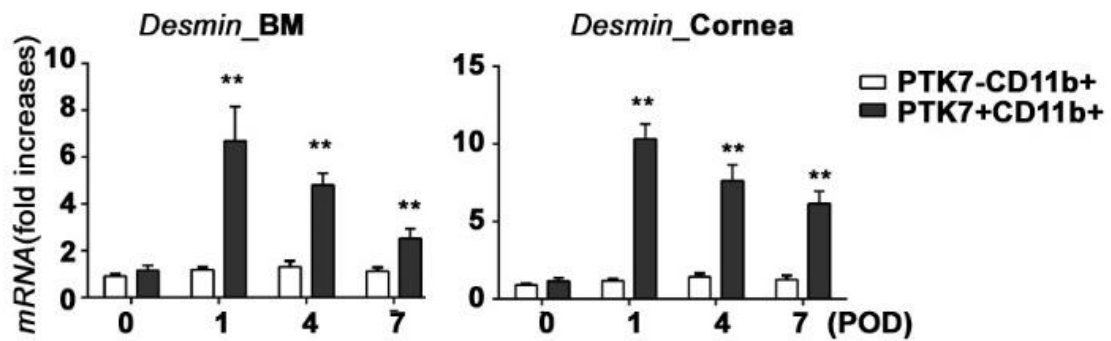

Supplement: NIHMS690116-supplement-Supplement.pdf [file NIHMS690116-supplement-Supplement.pdf]
